# Supplementary figures and images for: Hybrid Equation/Agent-Based Model of Ischemia-Induced Hyperemia and Pressure Ulcer Formation Predicts Greater Propensity to Ulcerate in Subjects with Spinal Cord Injury
Source: PLOS journal article supplement (doi:10.1371/journal.pcbi.1003070), 2013-05-16

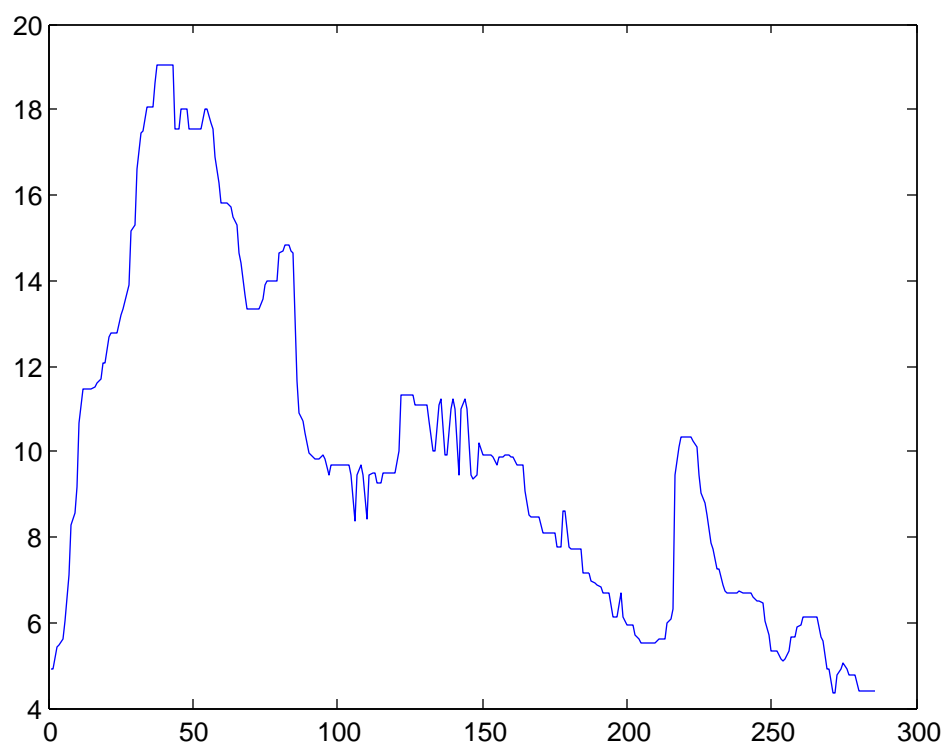

Supplement: S2 (10.1371/journal.pcbi.1003070.s002) [file journal.pcbi.1003070.s002]

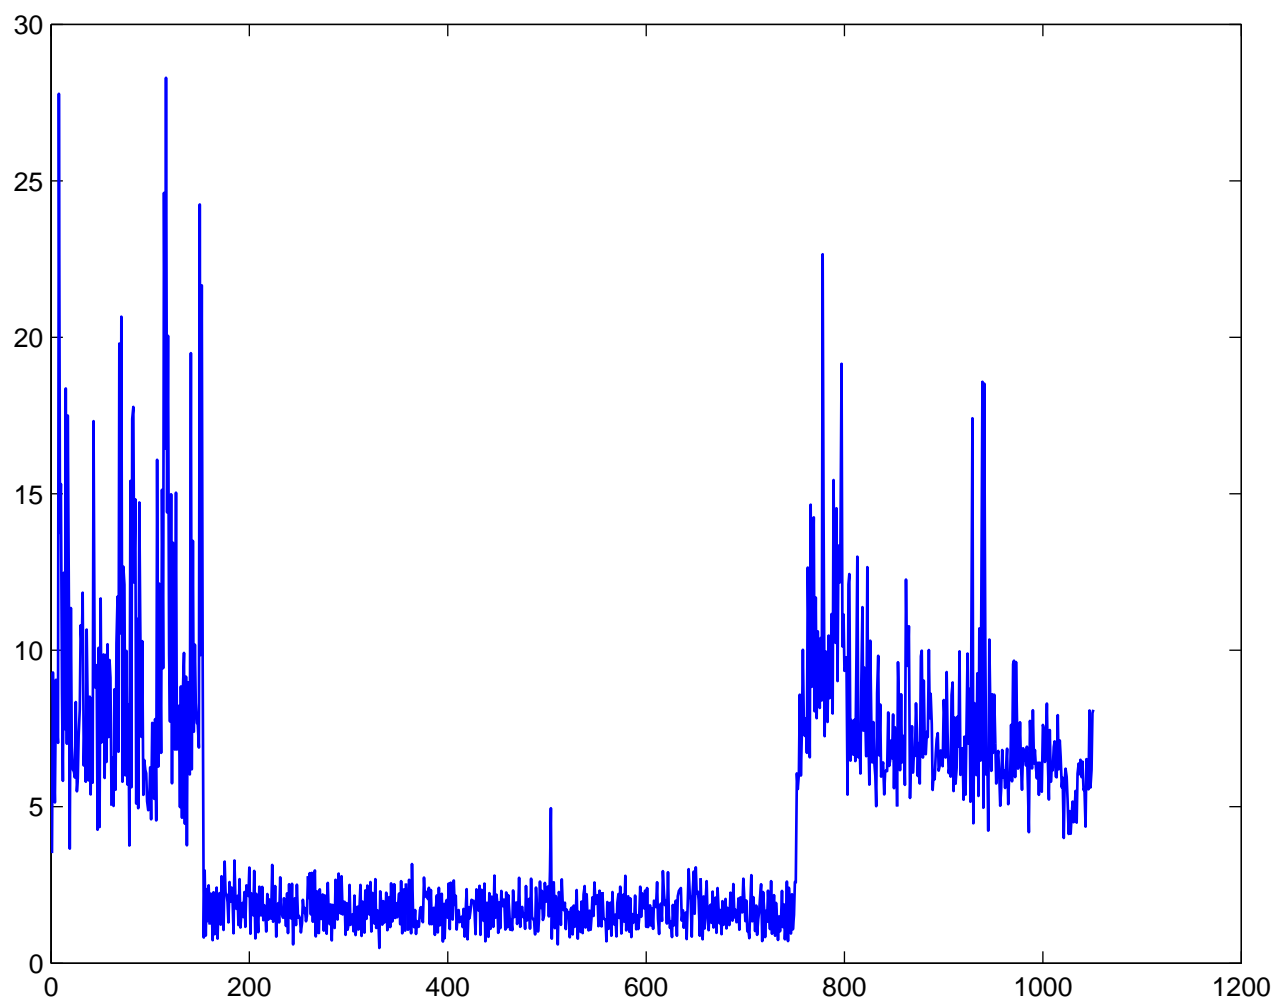

Supplement: S2 (10.1371/journal.pcbi.1003070.s002) [file journal.pcbi.1003070.s002]

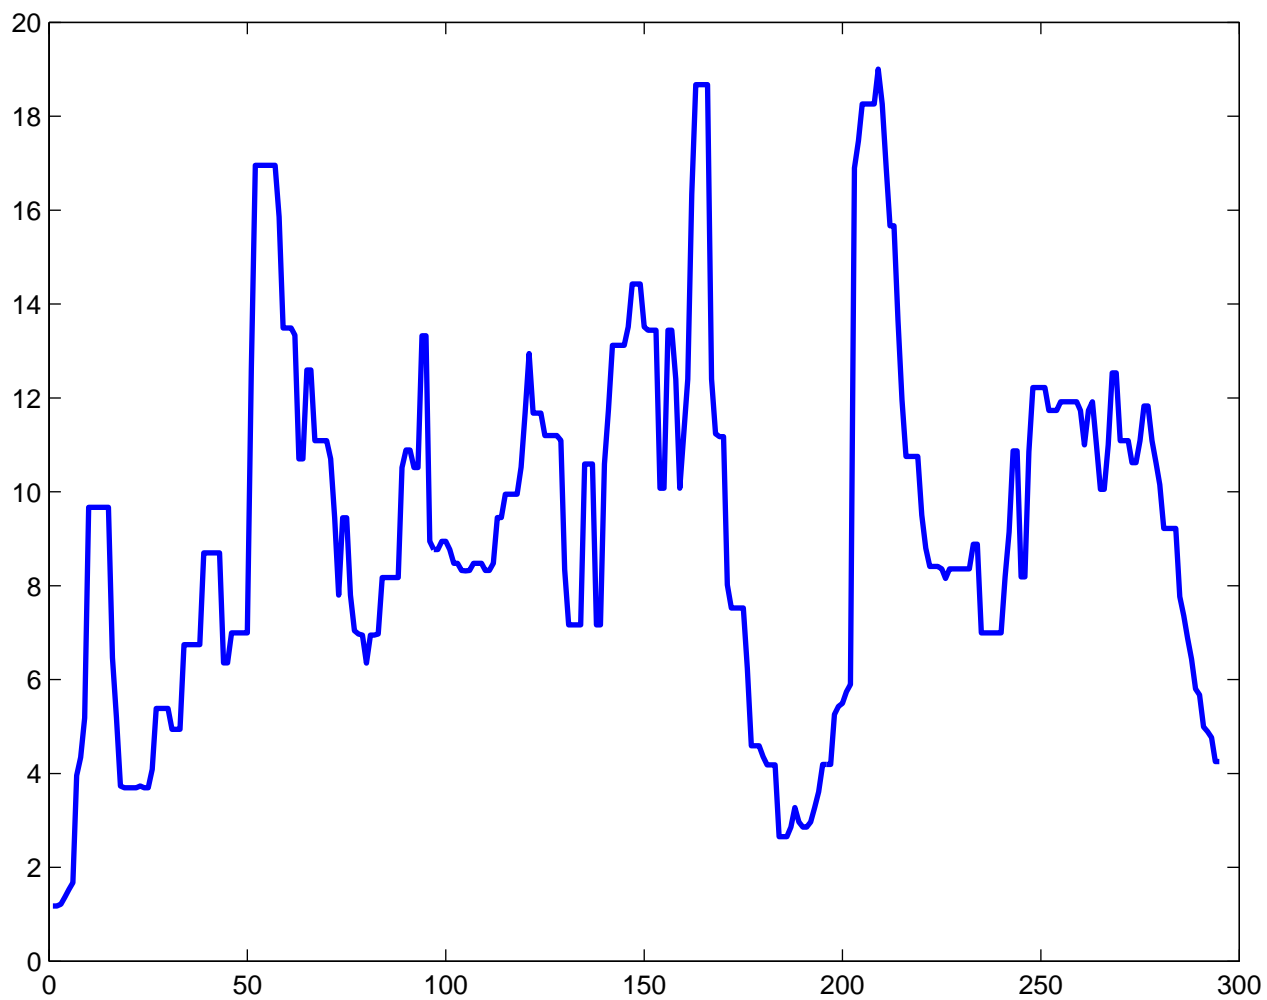

Supplement: S2 (10.1371/journal.pcbi.1003070.s002) [file journal.pcbi.1003070.s002]

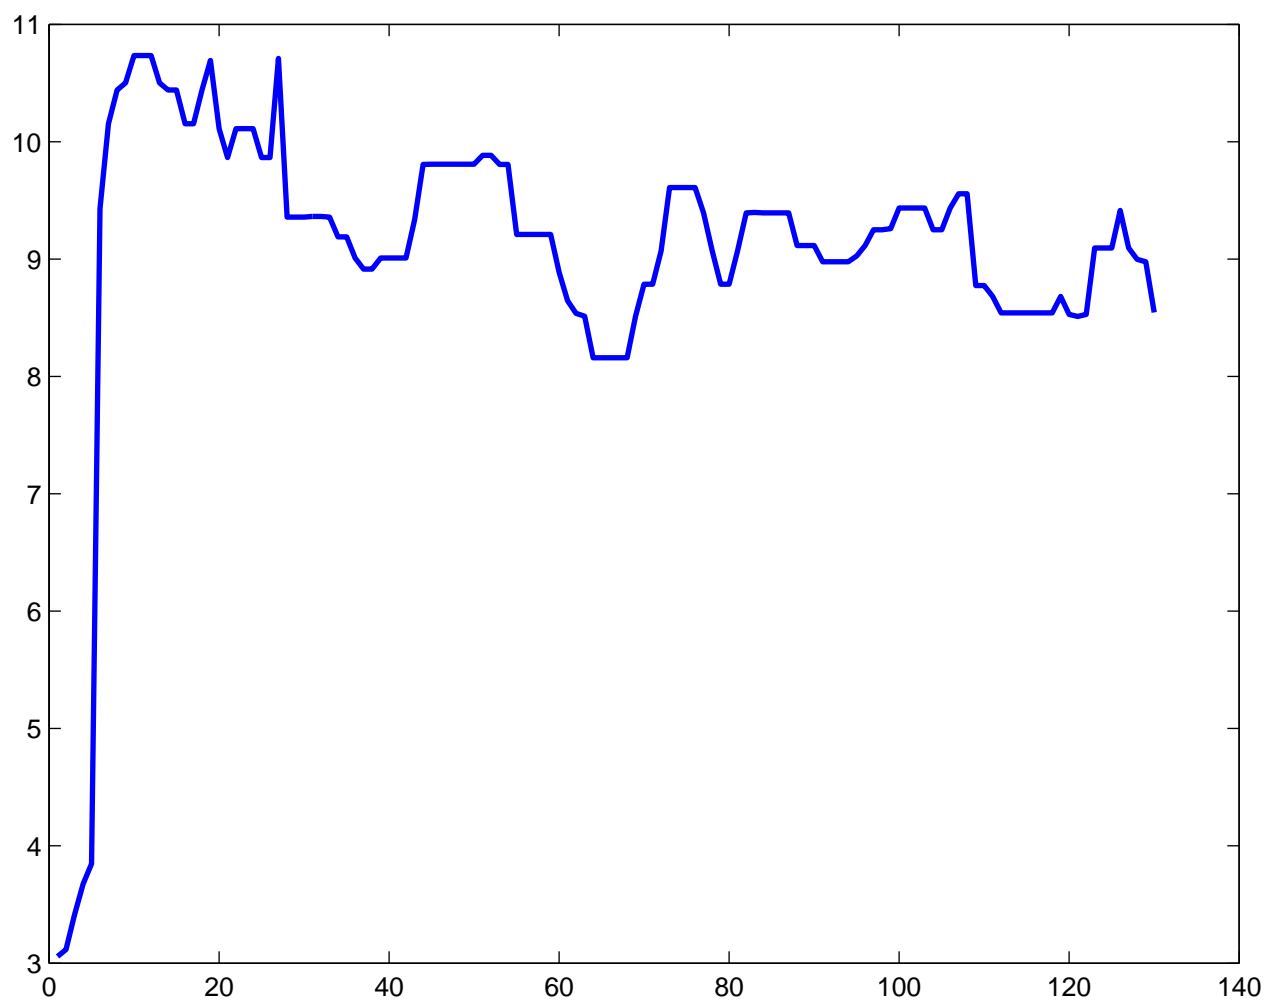

Supplement: S2 (10.1371/journal.pcbi.1003070.s002) [file journal.pcbi.1003070.s002]

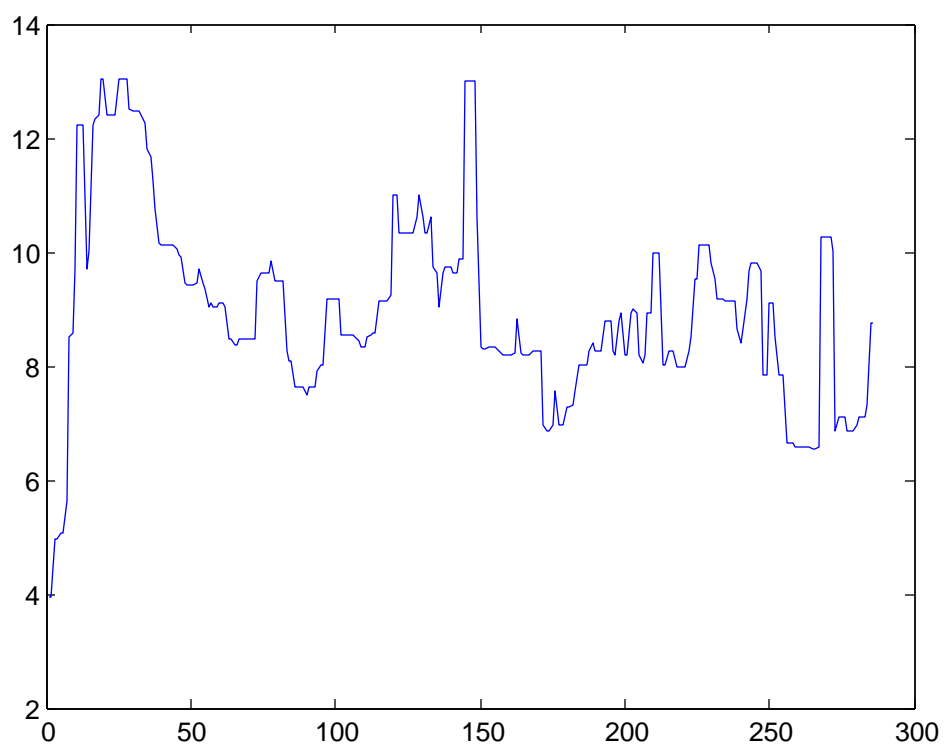

Supplement: S2 (10.1371/journal.pcbi.1003070.s002) [file journal.pcbi.1003070.s002]

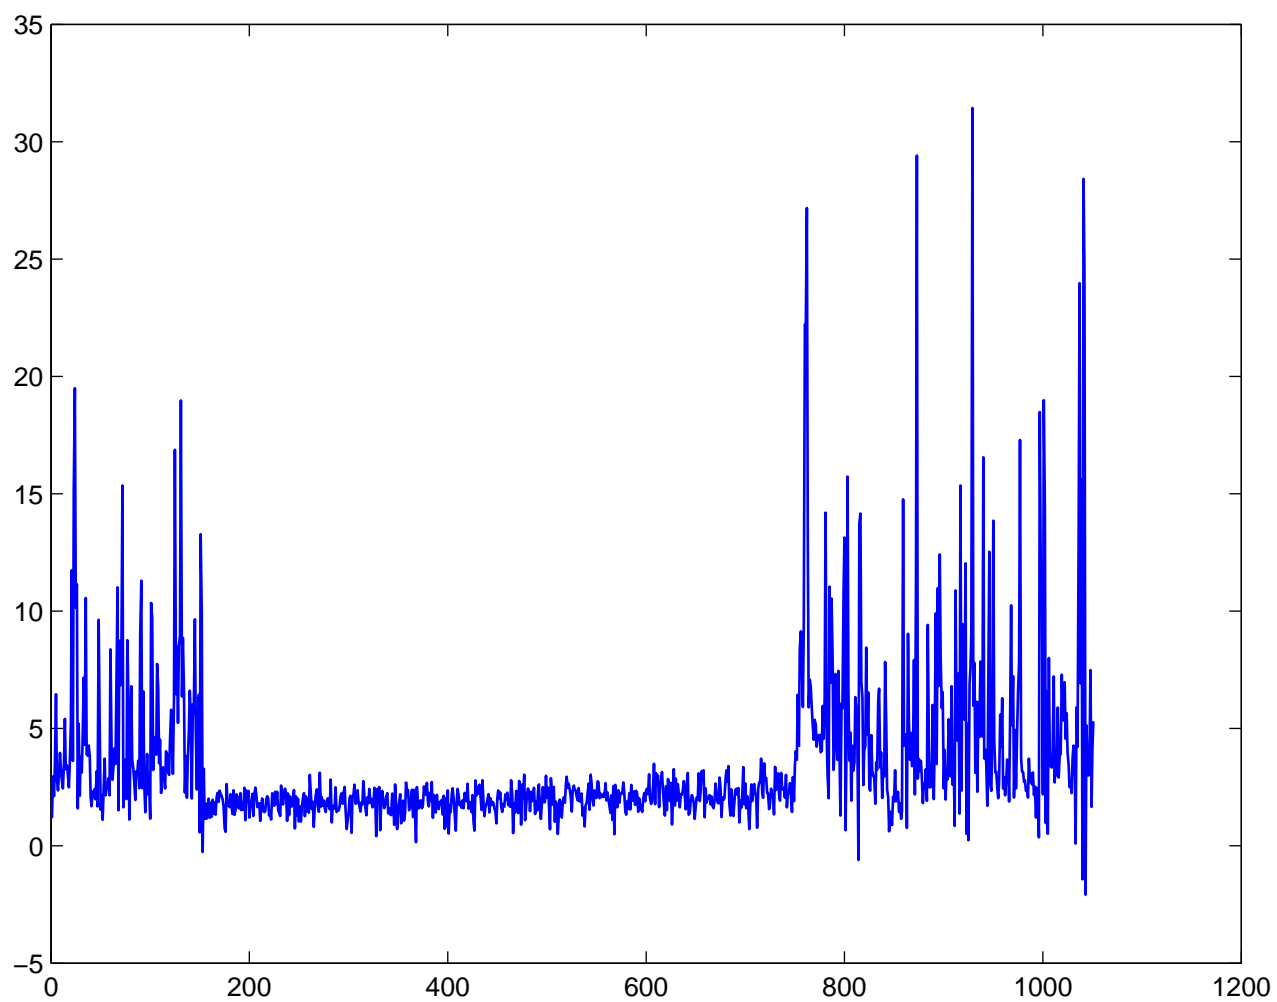

Supplement: S2 (10.1371/journal.pcbi.1003070.s002) [file journal.pcbi.1003070.s002]

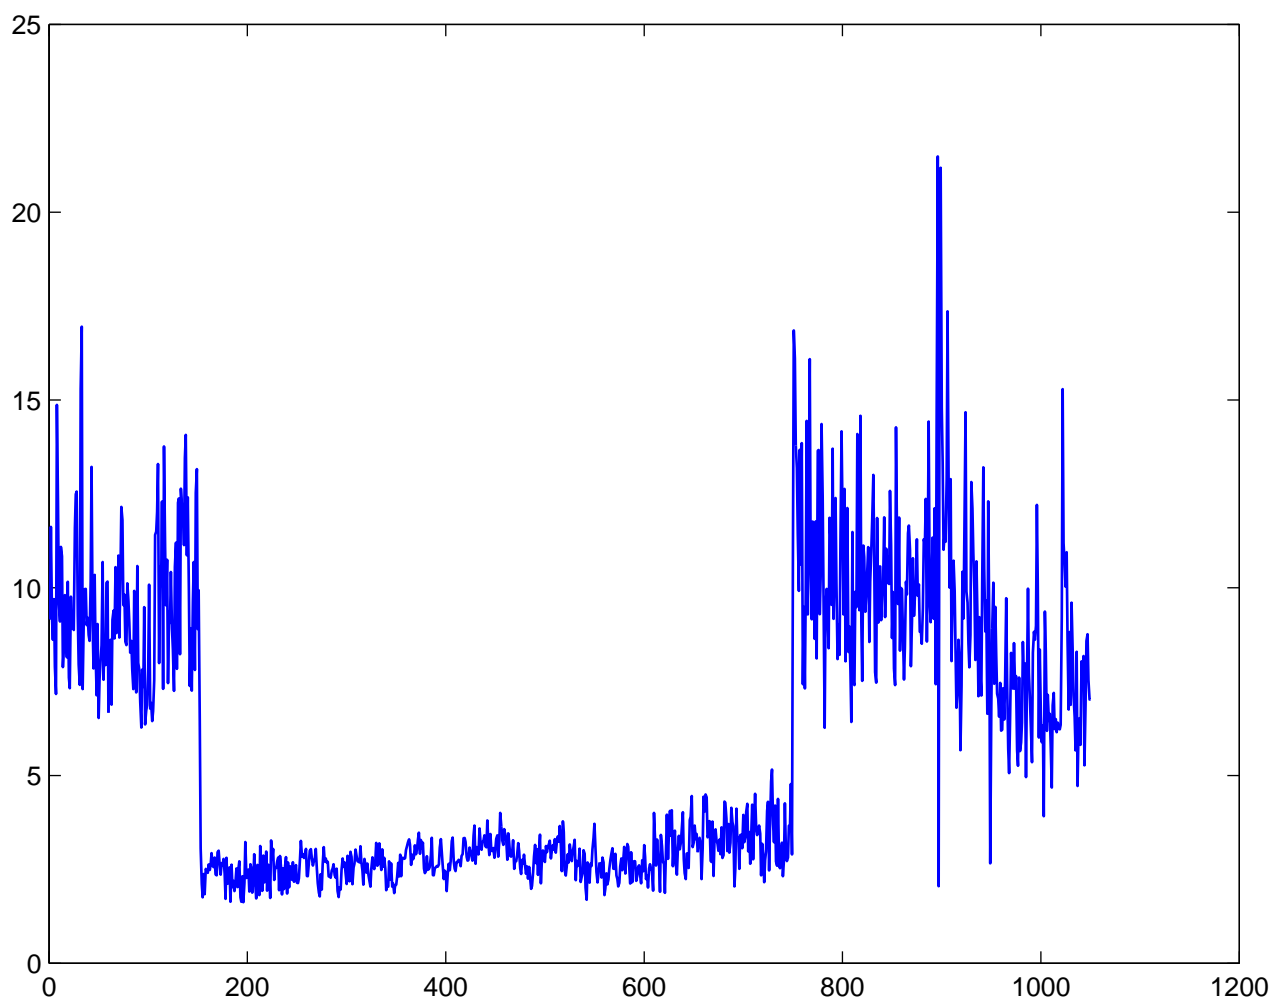

Supplement: S2 (10.1371/journal.pcbi.1003070.s002) [file journal.pcbi.1003070.s002]

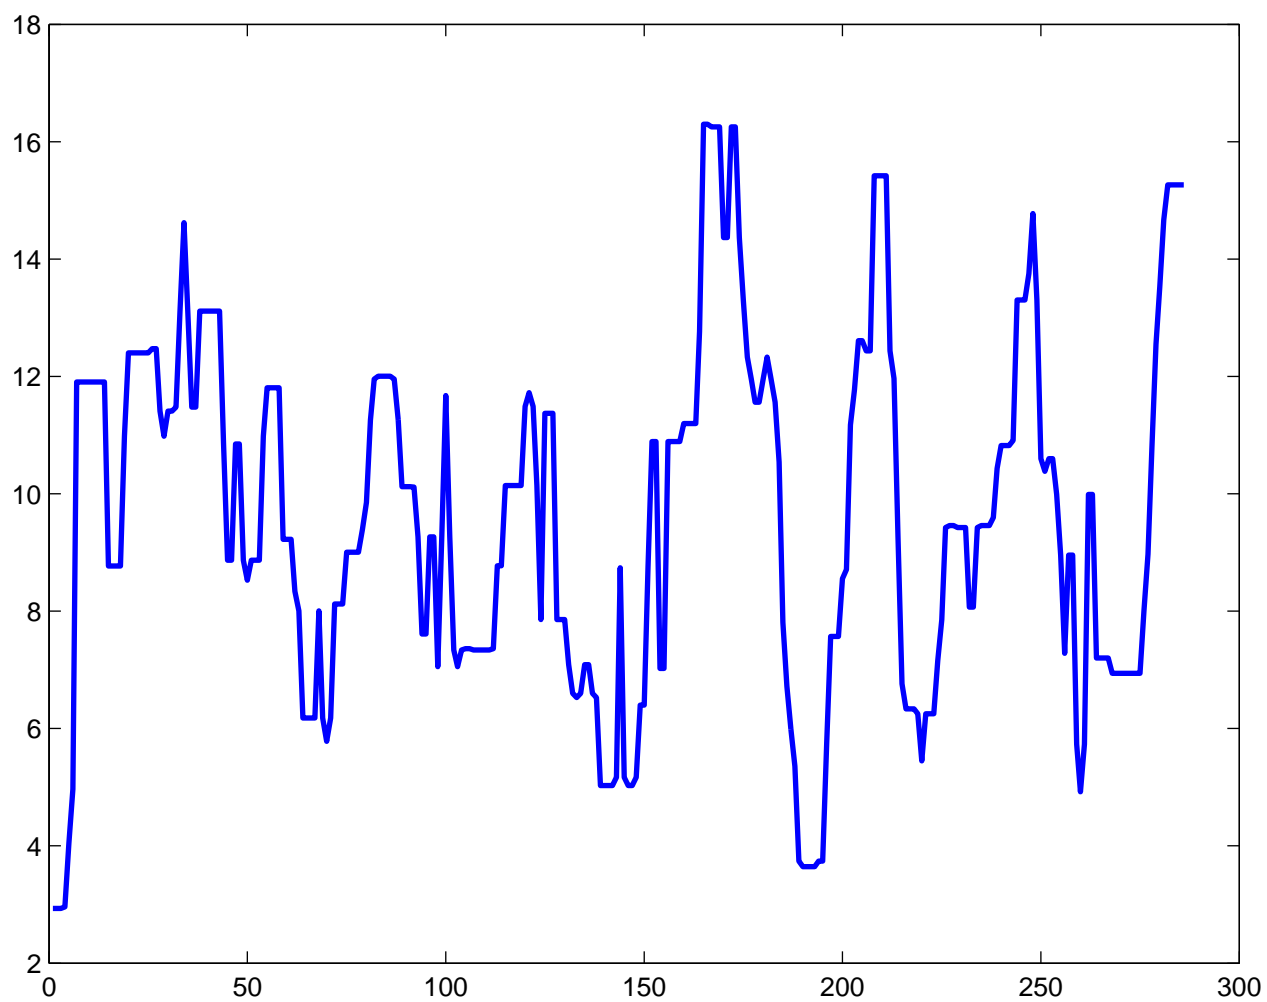

Supplement: S2 (10.1371/journal.pcbi.1003070.s002) [file journal.pcbi.1003070.s002]

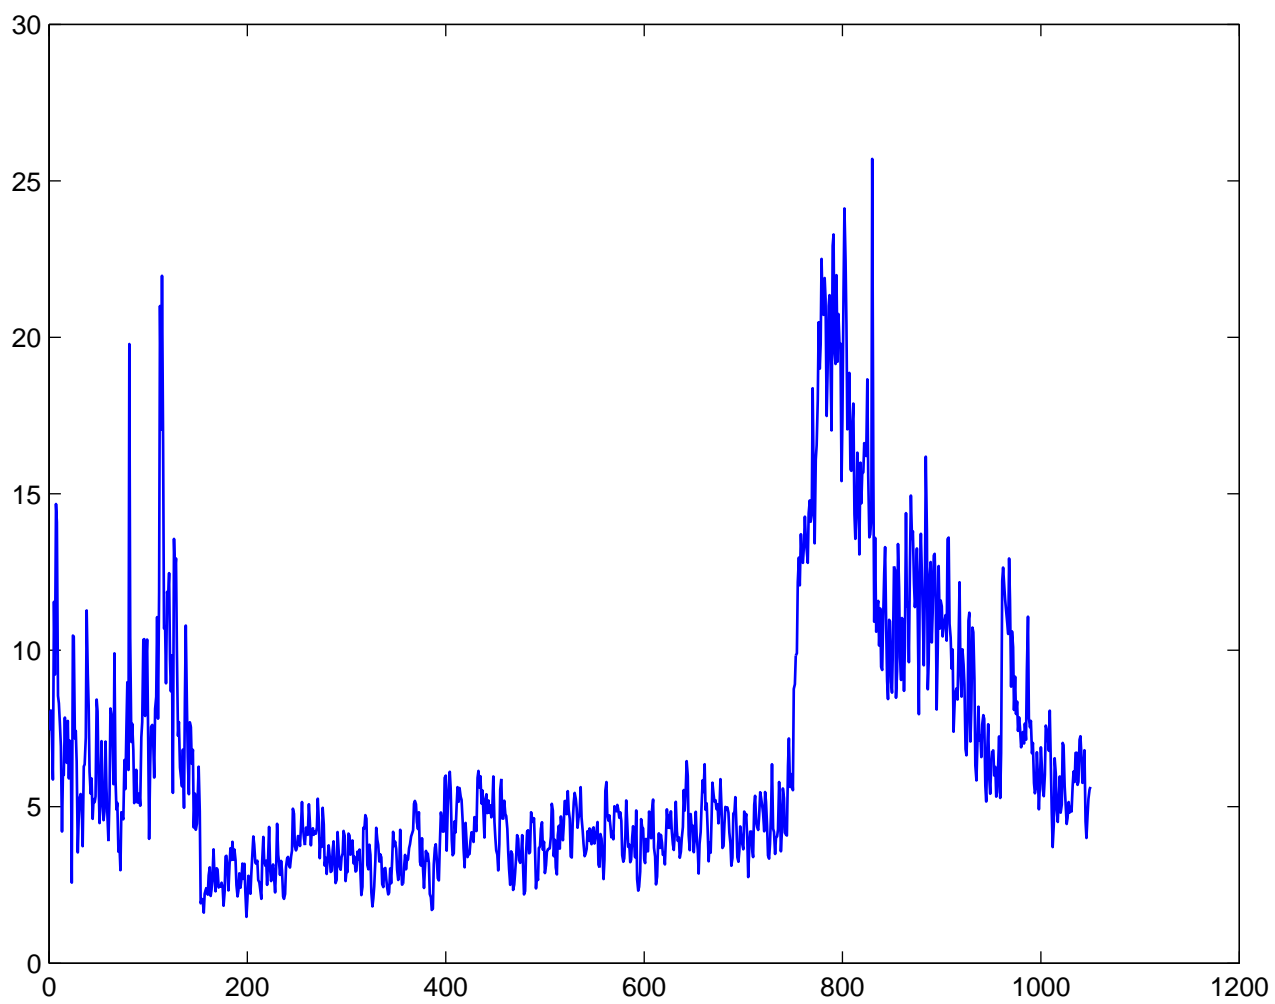

Supplement: S2 (10.1371/journal.pcbi.1003070.s002) [file journal.pcbi.1003070.s002]

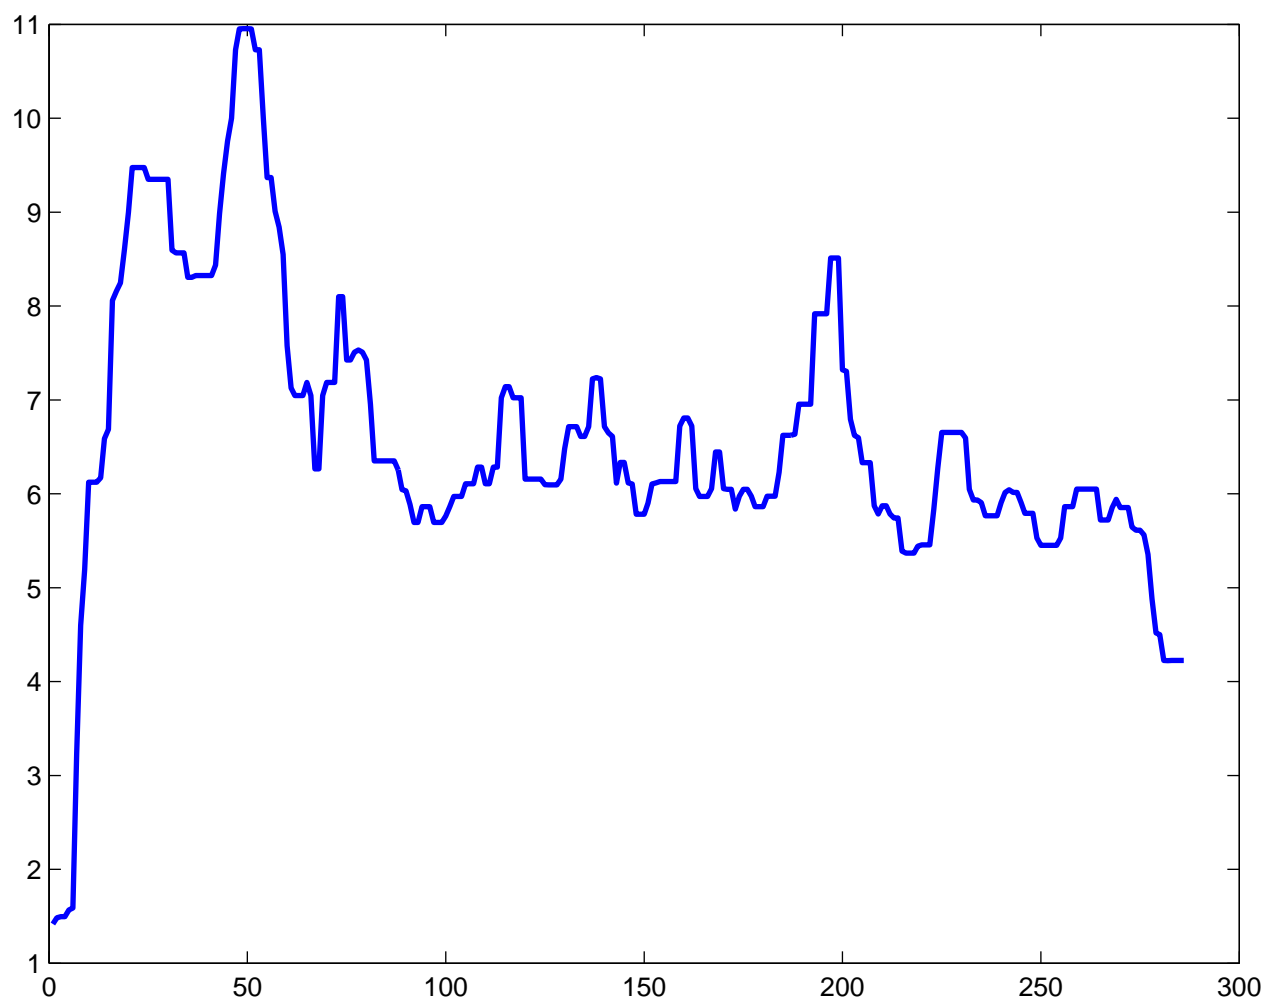

Supplement: S2 (10.1371/journal.pcbi.1003070.s002) [file journal.pcbi.1003070.s002]

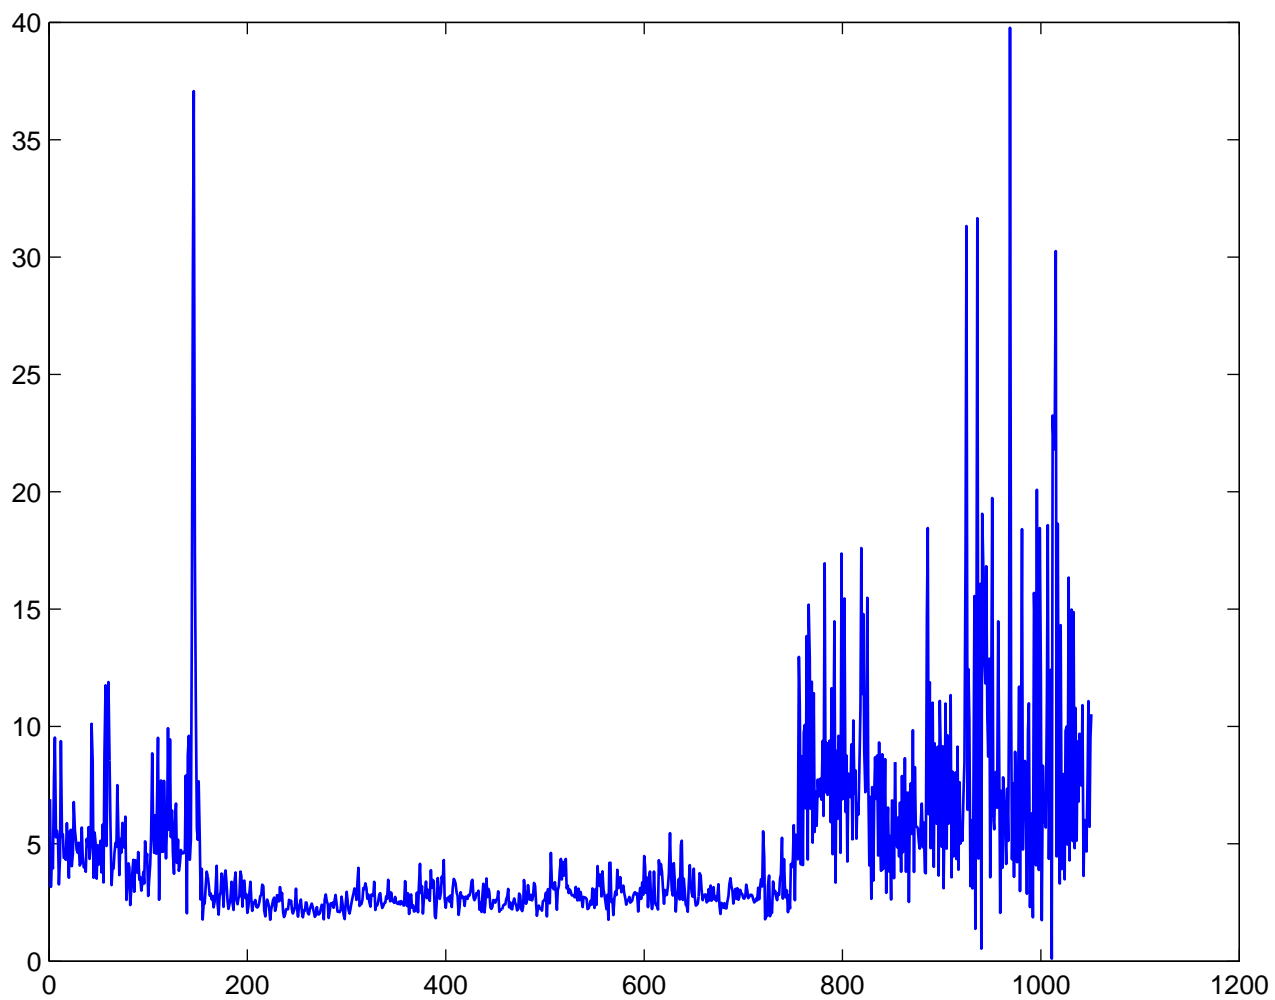

Supplement: S2 (10.1371/journal.pcbi.1003070.s002) [file journal.pcbi.1003070.s002]

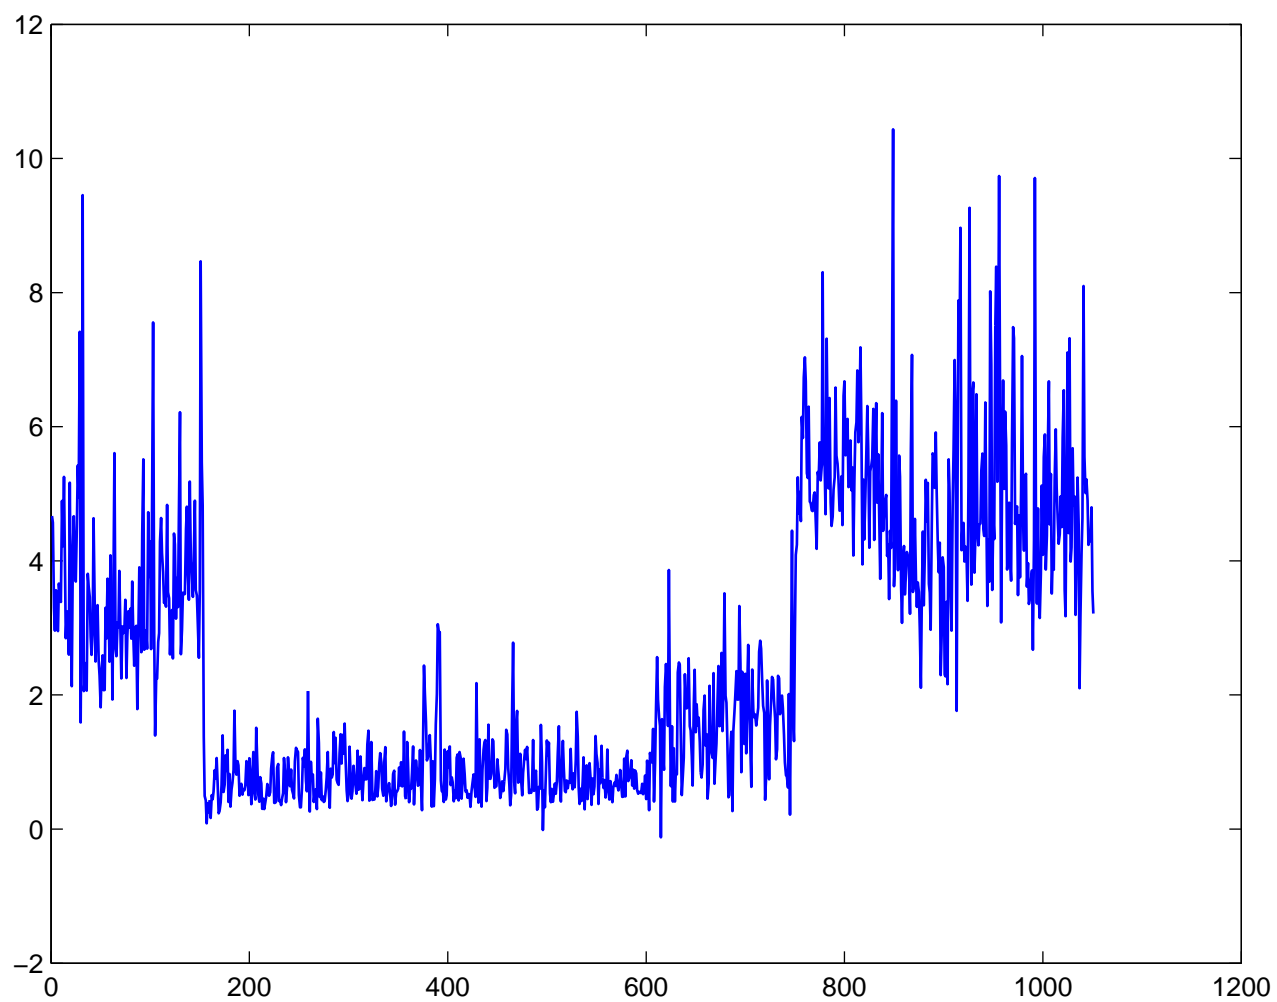

Supplement: S2 (10.1371/journal.pcbi.1003070.s002) [file journal.pcbi.1003070.s002]

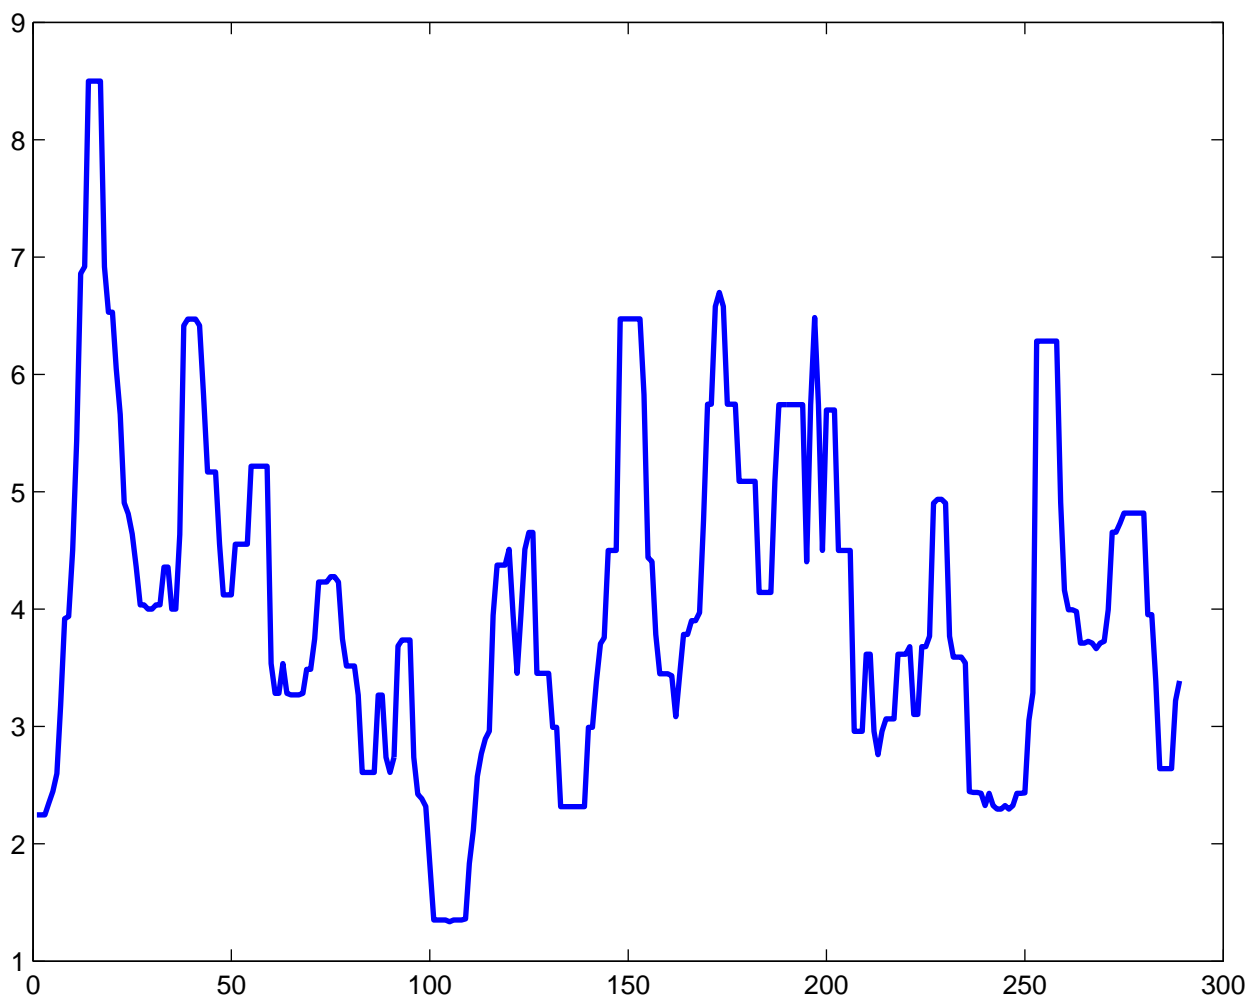

Supplement: S2 (10.1371/journal.pcbi.1003070.s002) [file journal.pcbi.1003070.s002]

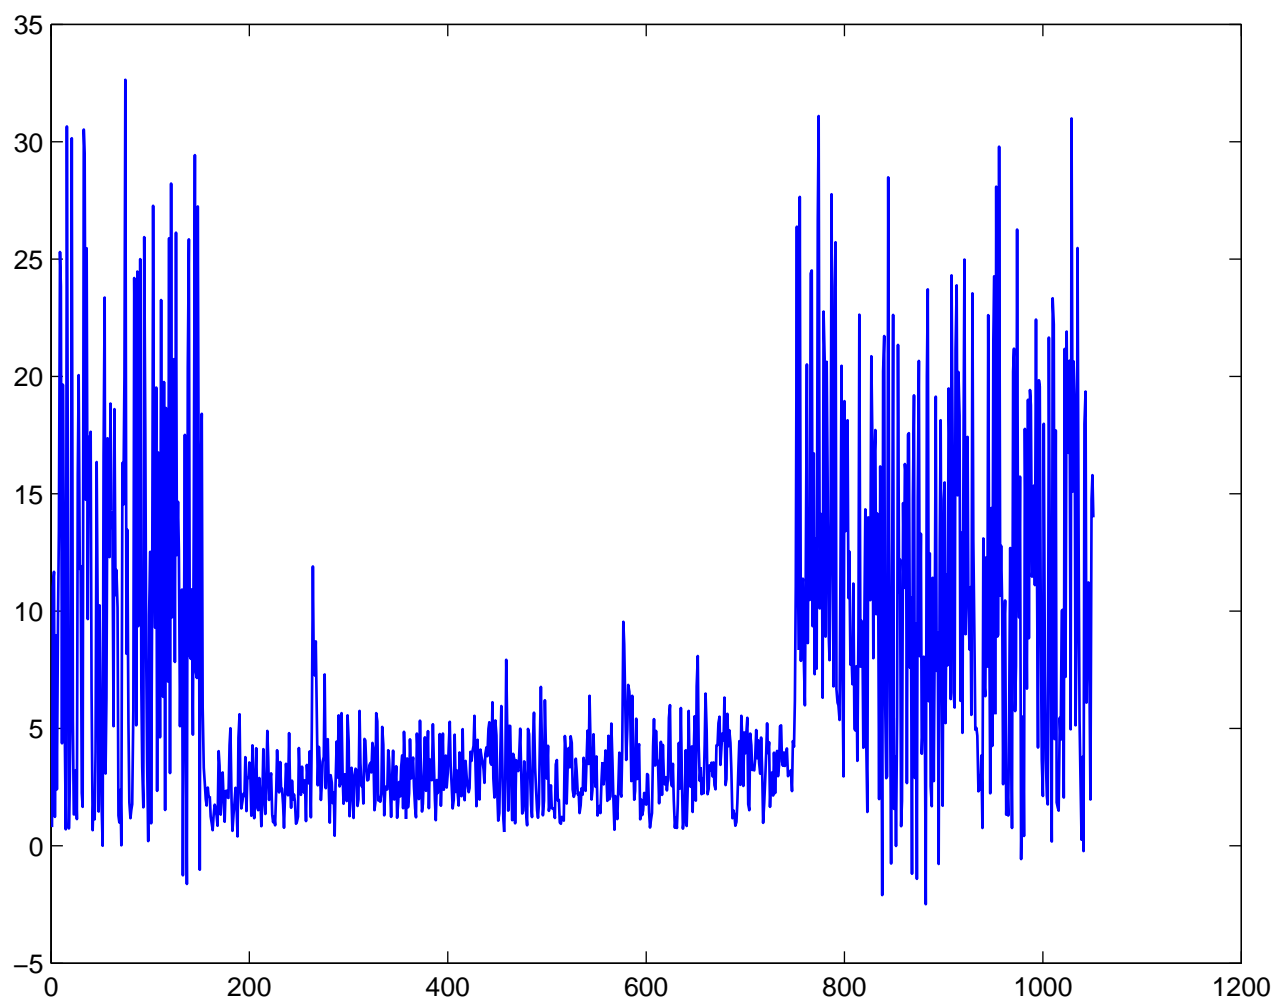

Supplement: S2 (10.1371/journal.pcbi.1003070.s002) [file journal.pcbi.1003070.s002]

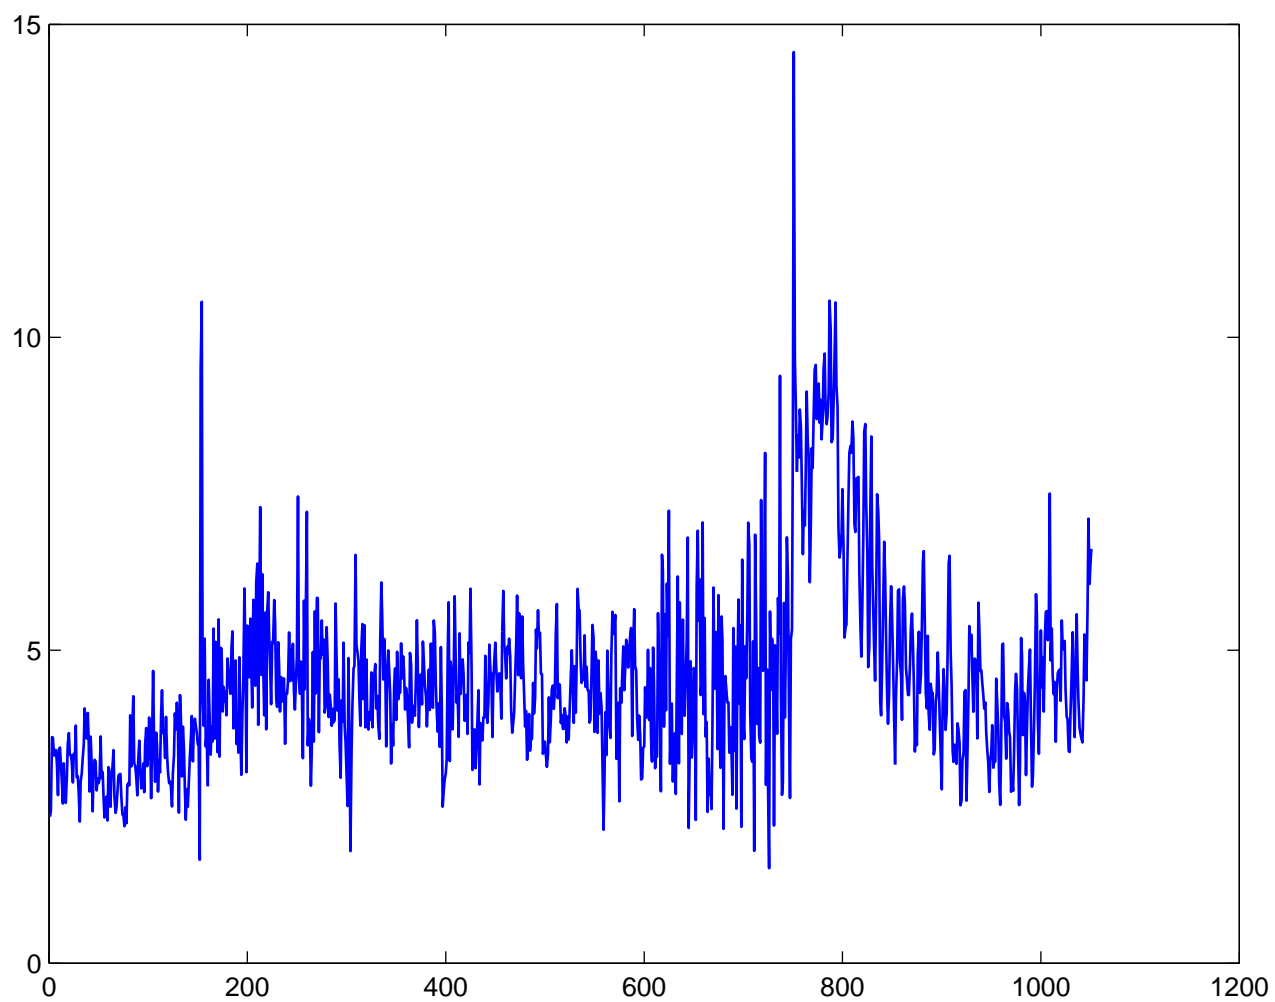

Supplement: S2 (10.1371/journal.pcbi.1003070.s002) [file journal.pcbi.1003070.s002]

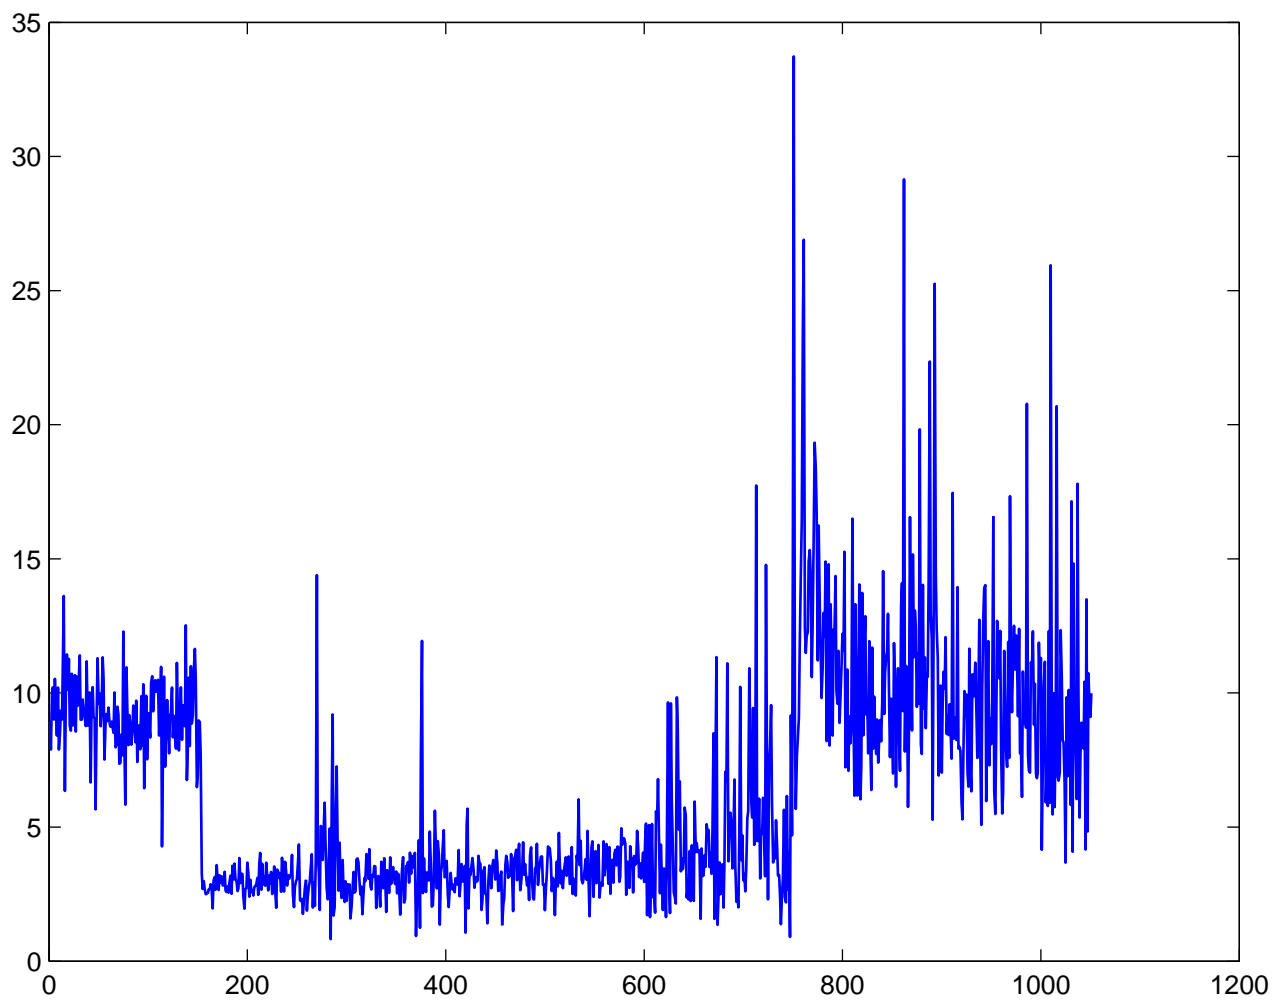

Supplement: S2 (10.1371/journal.pcbi.1003070.s002) [file journal.pcbi.1003070.s002]

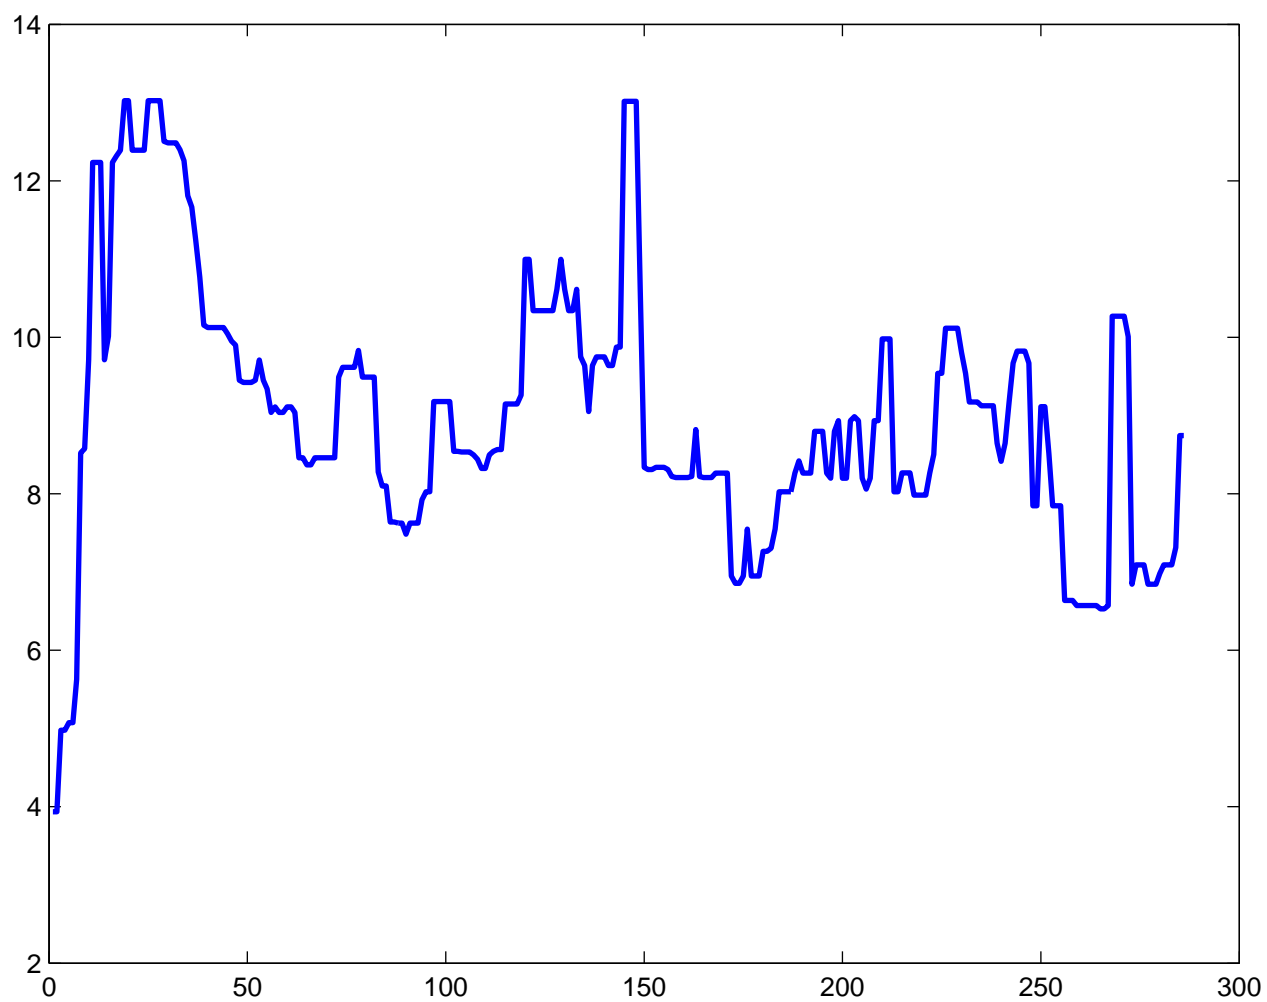

Supplement: S2 (10.1371/journal.pcbi.1003070.s002) [file journal.pcbi.1003070.s002]

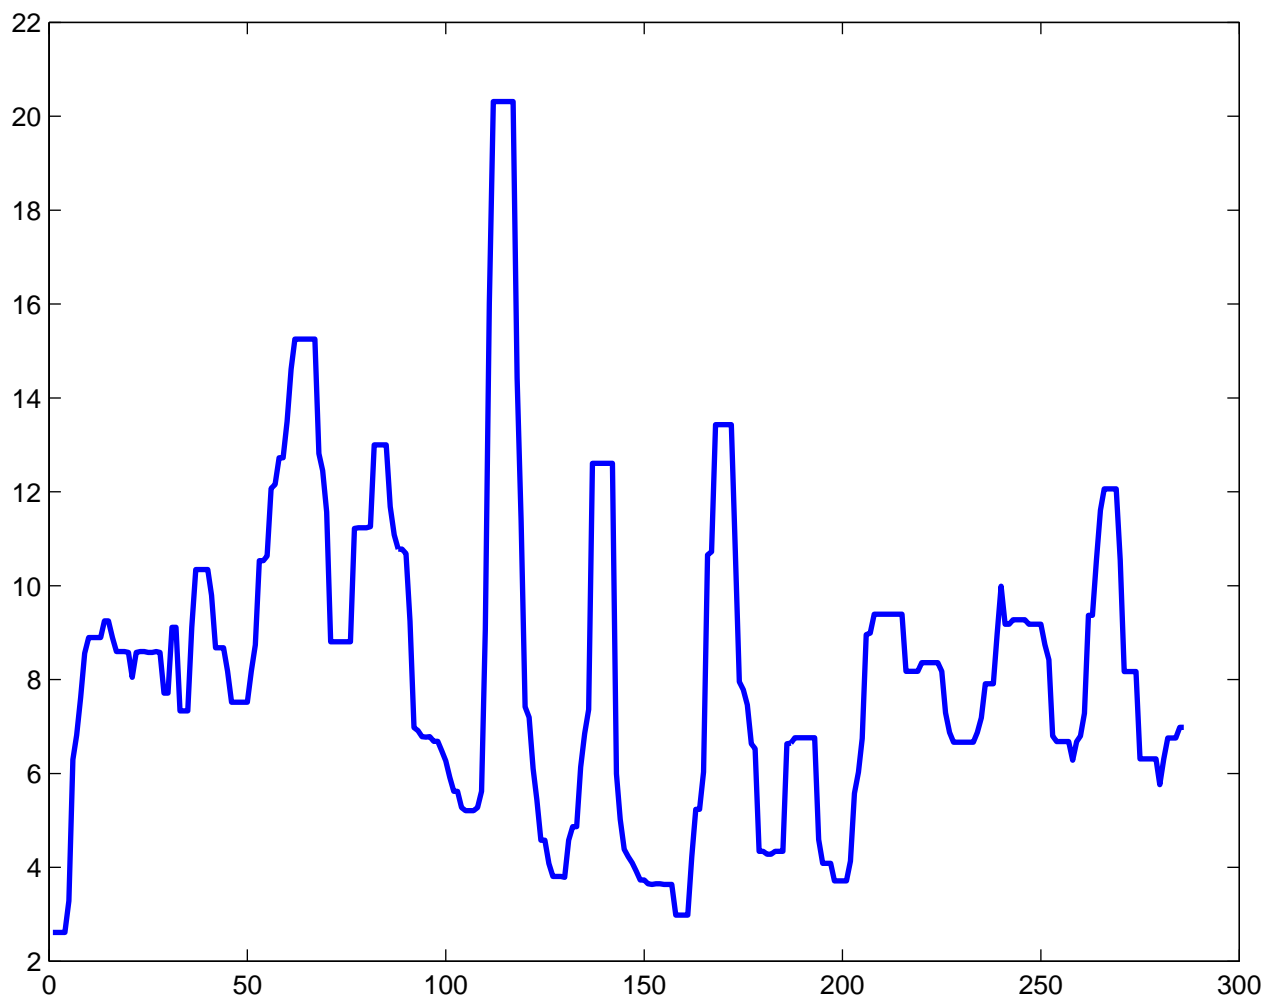

Supplement: S2 (10.1371/journal.pcbi.1003070.s002) [file journal.pcbi.1003070.s002]

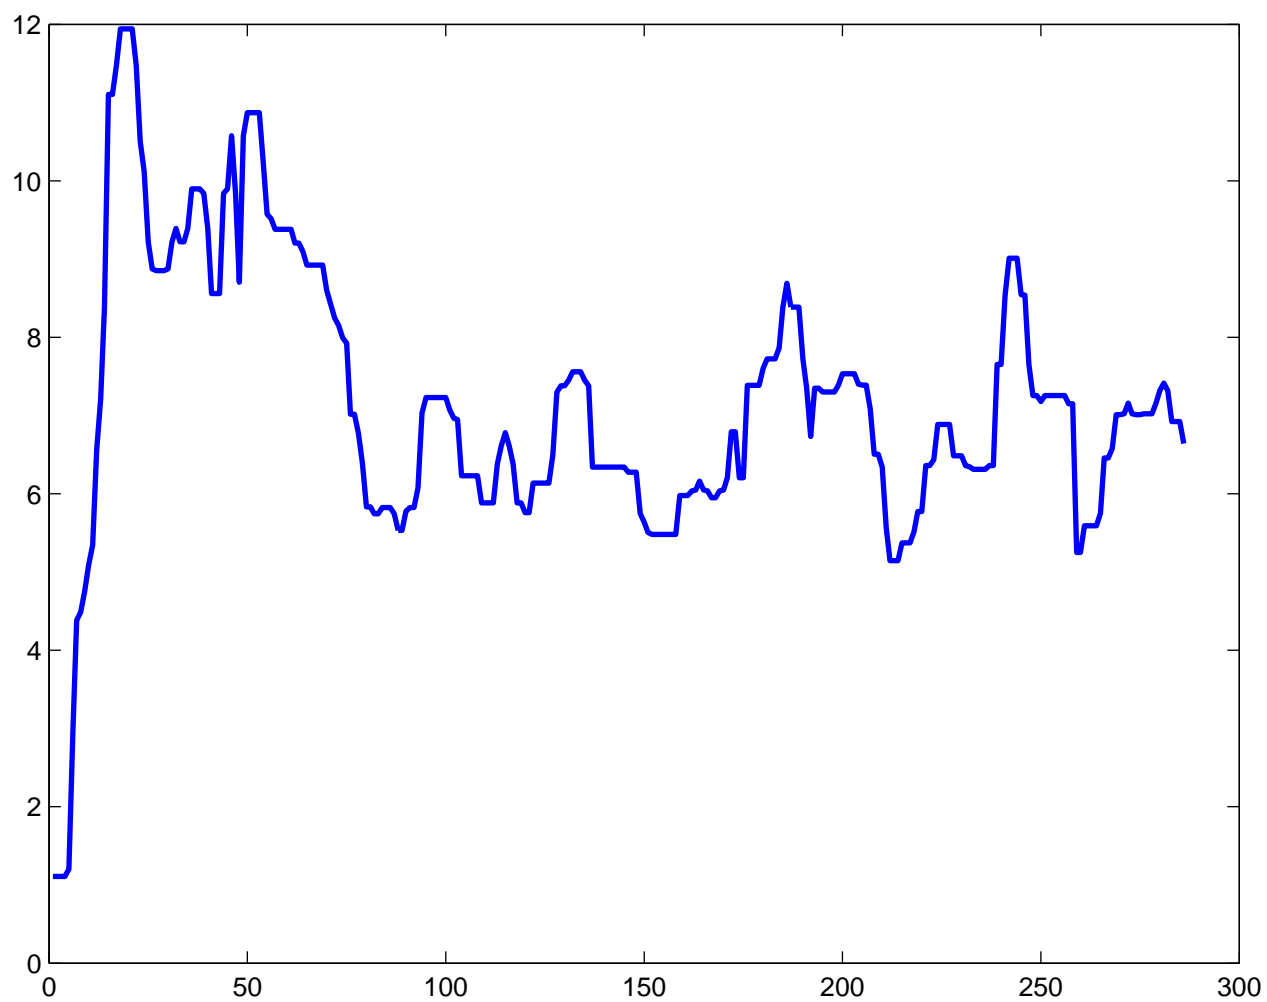

Supplement: S2 (10.1371/journal.pcbi.1003070.s002) [file journal.pcbi.1003070.s002]

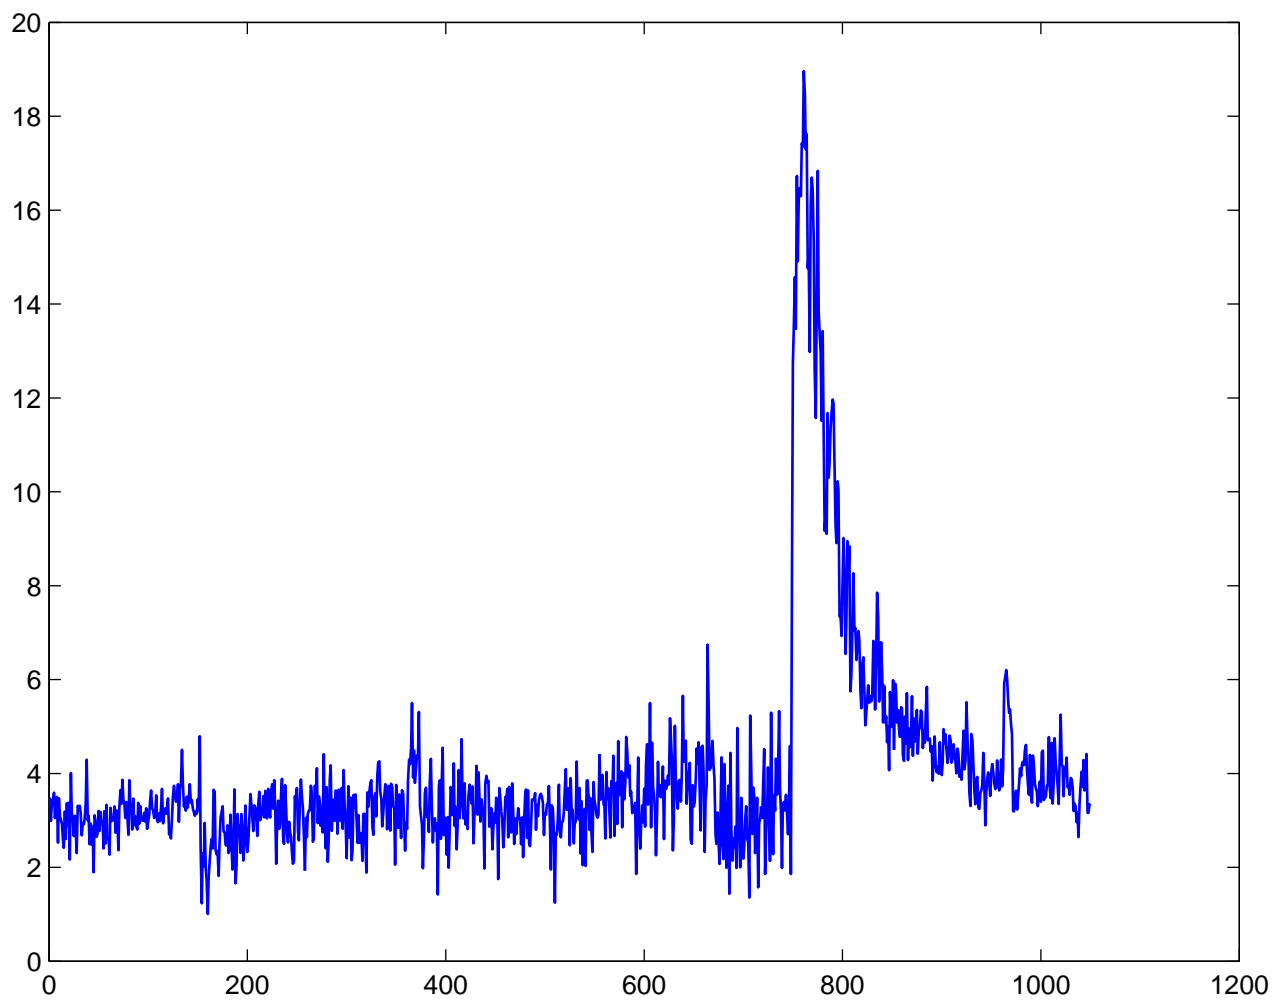

Supplement: S2 (10.1371/journal.pcbi.1003070.s002) [file journal.pcbi.1003070.s002]

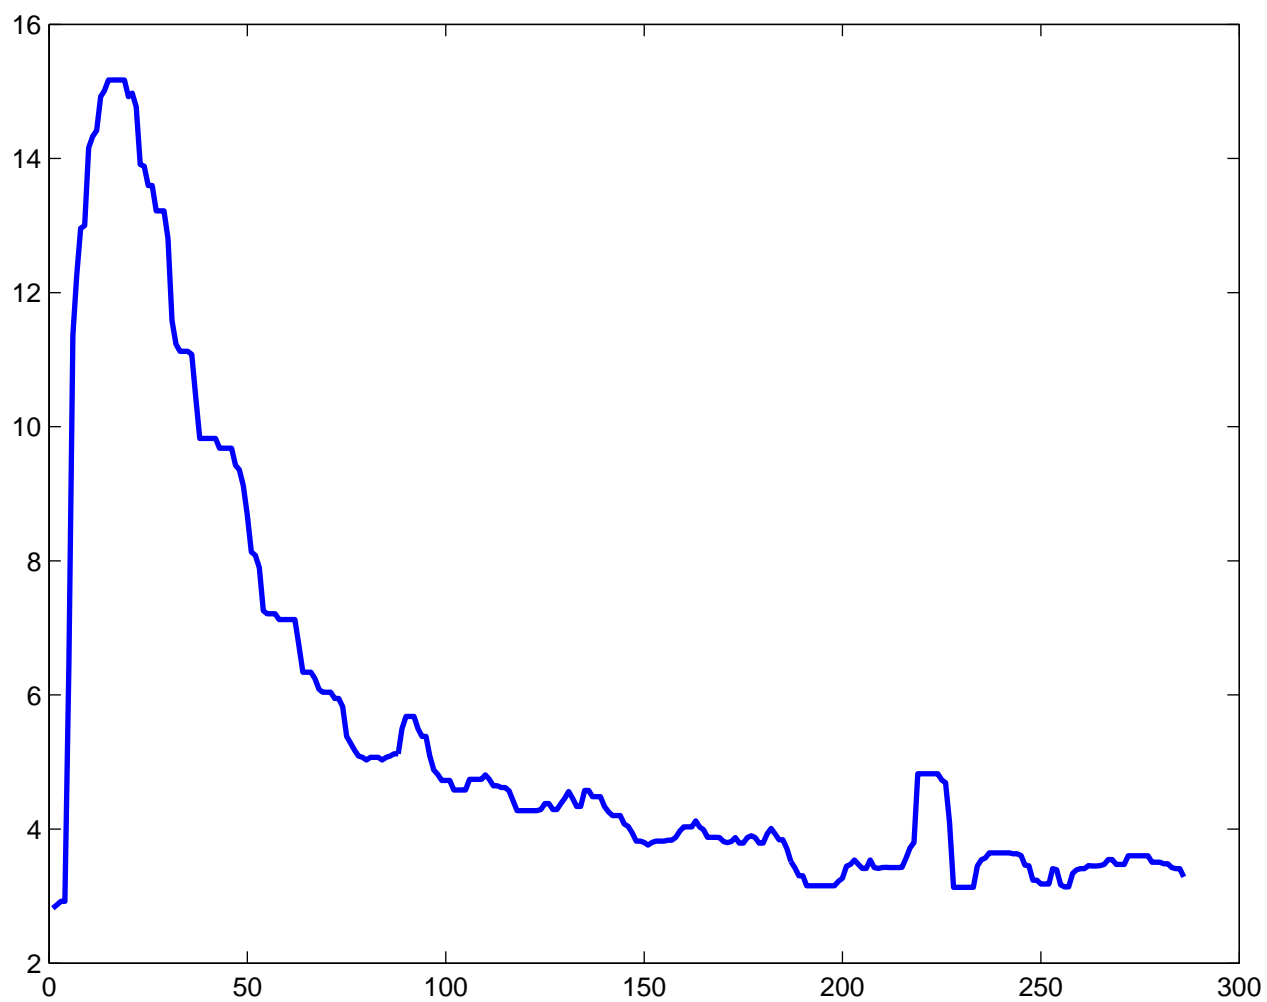

Supplement: S2 (10.1371/journal.pcbi.1003070.s002) [file journal.pcbi.1003070.s002]

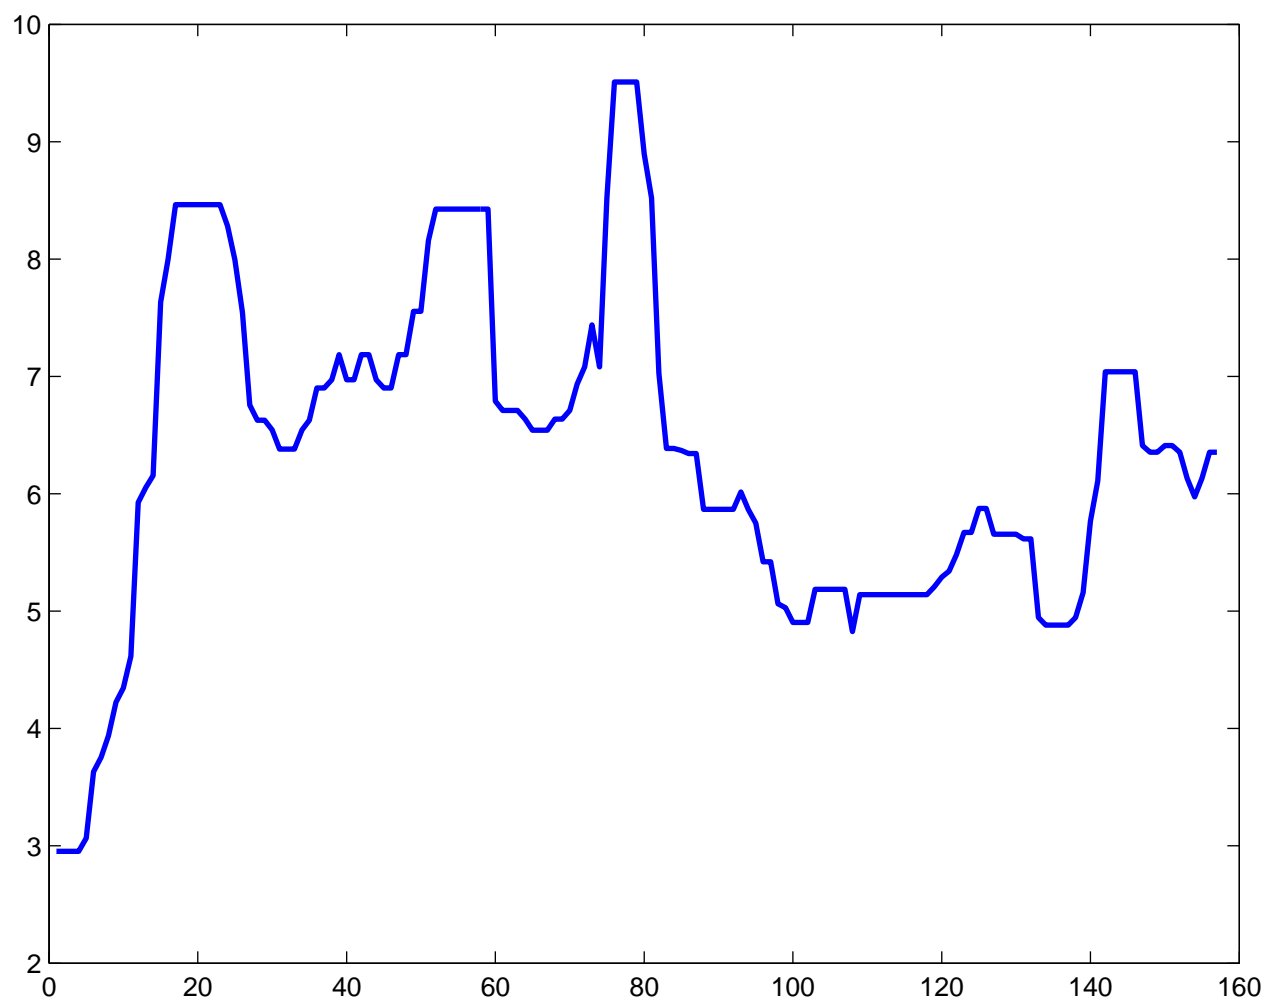

Supplement: S2 (10.1371/journal.pcbi.1003070.s002) [file journal.pcbi.1003070.s002]

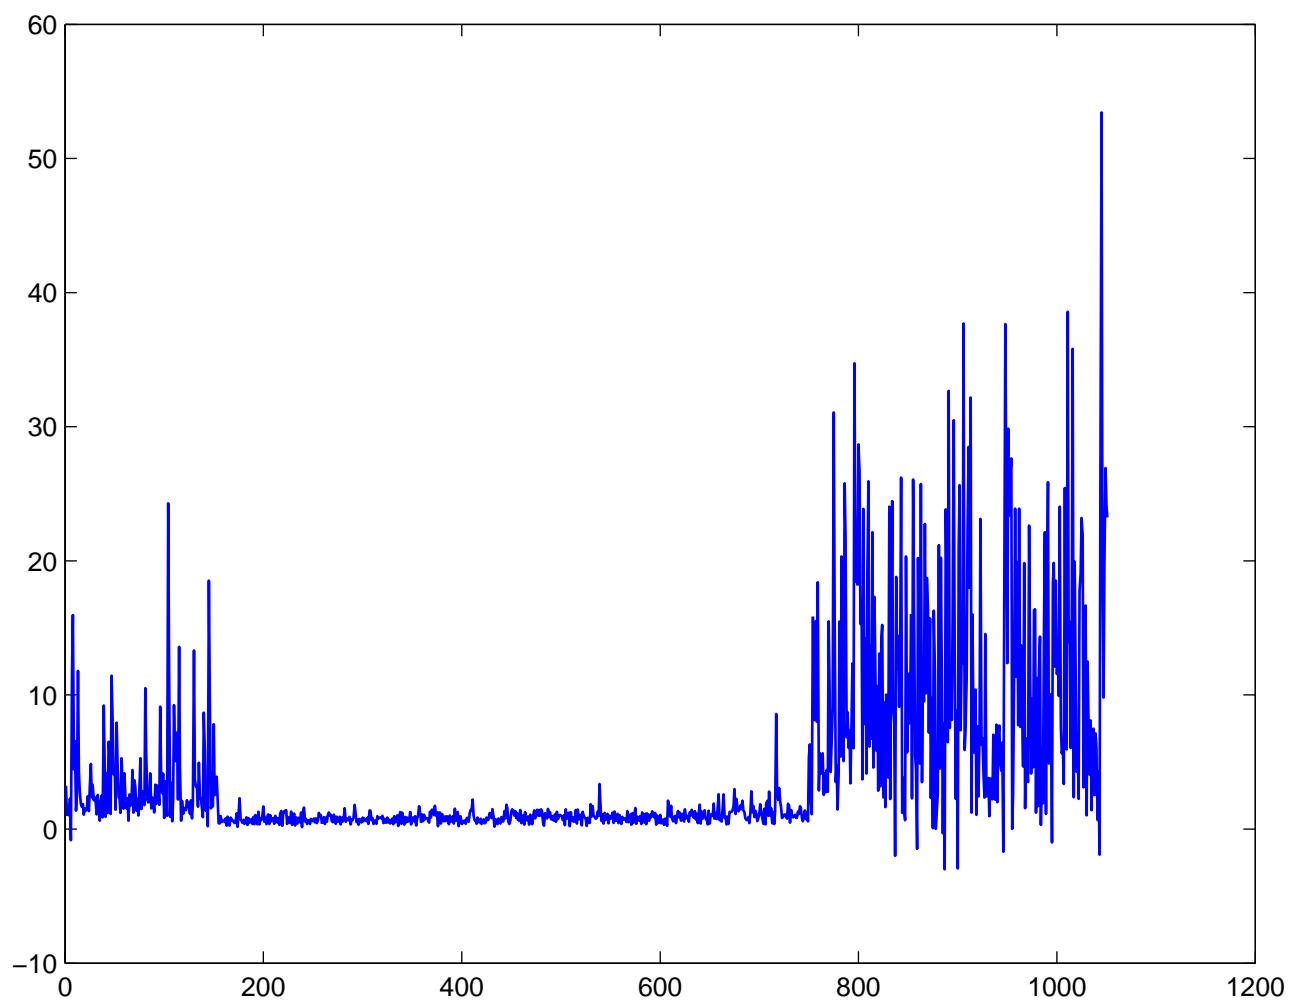

Supplement: S2 (10.1371/journal.pcbi.1003070.s002) [file journal.pcbi.1003070.s002]

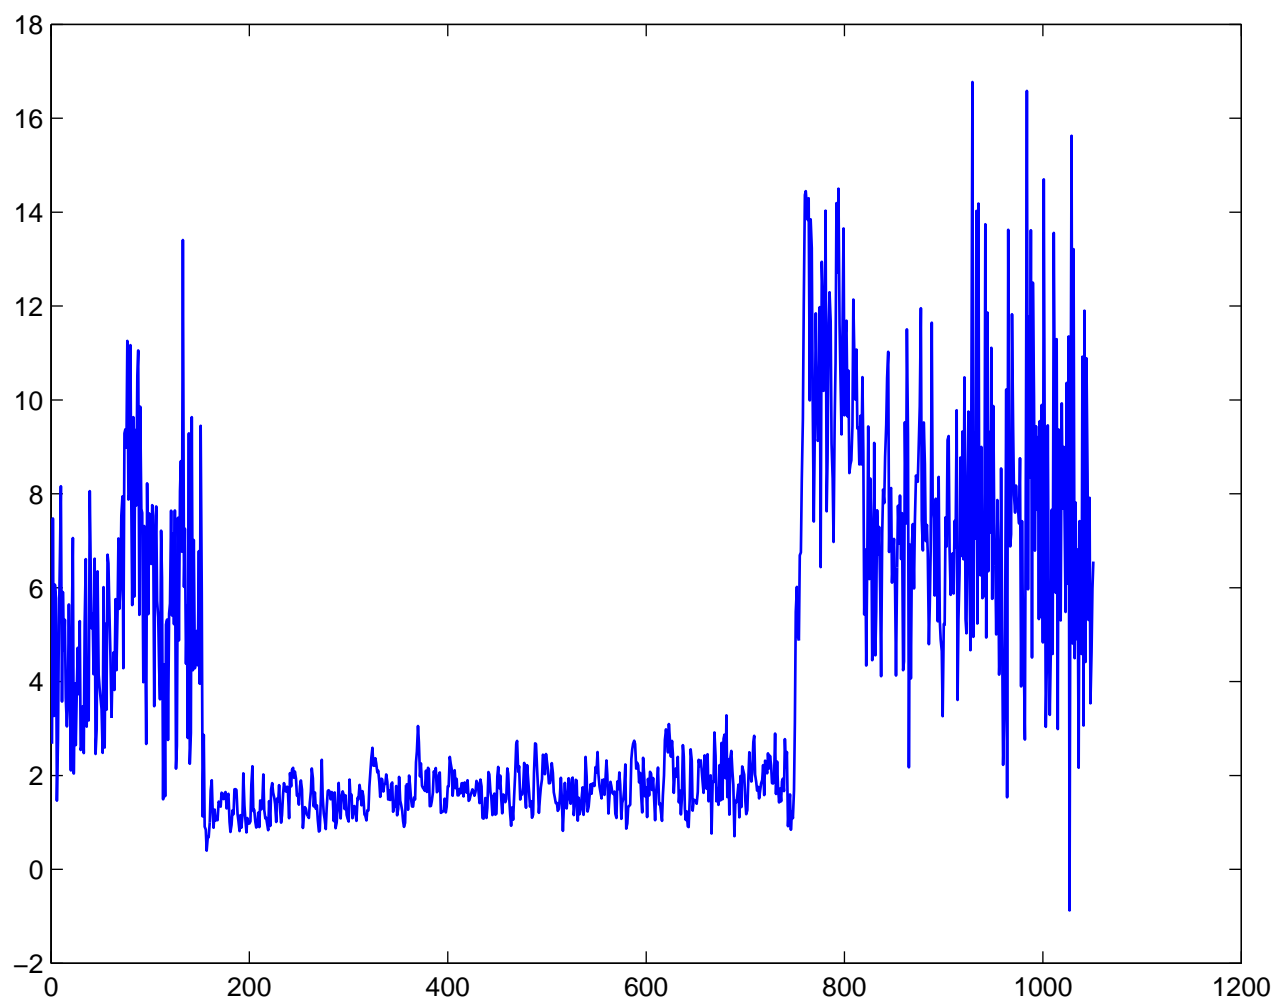

Supplement: S2 (10.1371/journal.pcbi.1003070.s002) [file journal.pcbi.1003070.s002]

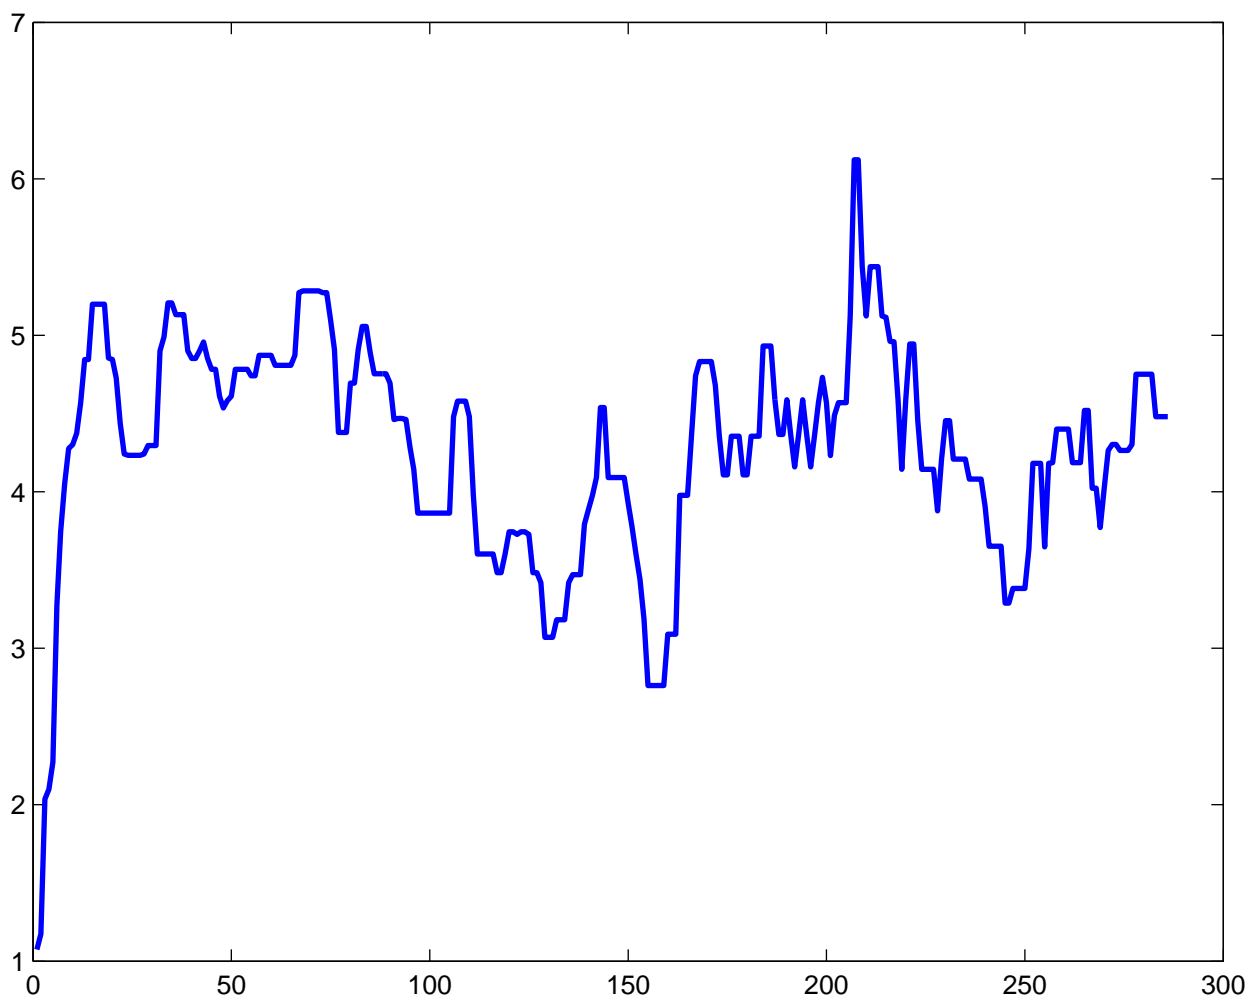

Supplement: S2 (10.1371/journal.pcbi.1003070.s002) [file journal.pcbi.1003070.s002]

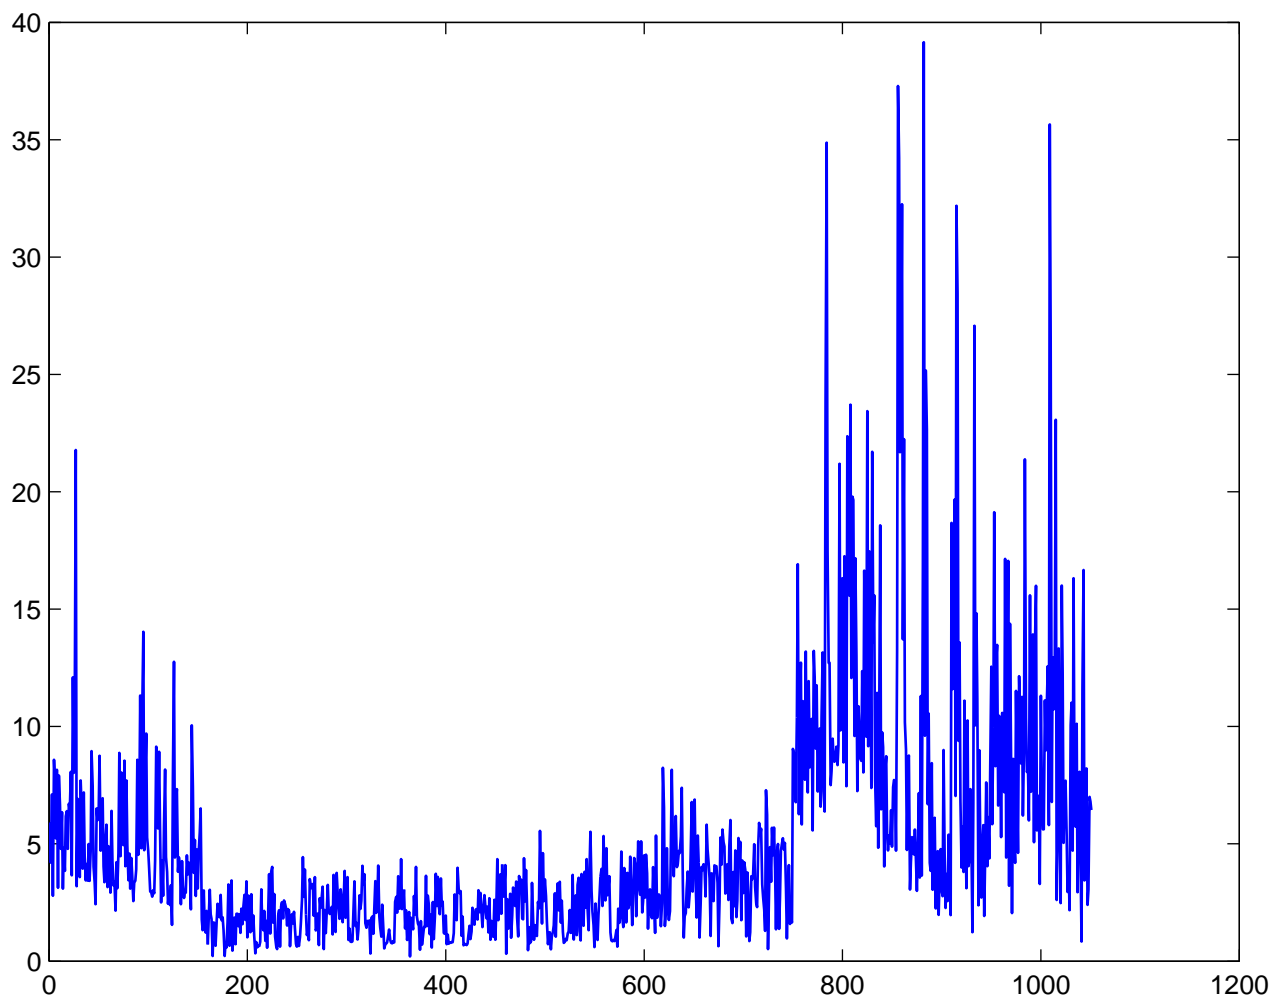

Supplement: S2 (10.1371/journal.pcbi.1003070.s002) [file journal.pcbi.1003070.s002]
